# Supplementary material
Source: PubMed Central journal article supplement (PMC1828874)
Supplement: NIHMS16462-supplement-supp.pdf [file NIHMS16462-supplement-supp.pdf]

# Optimized Synthesis of Hydrogen-Bond Surrogate Helices: Surprising Effects of Microwave Heating on the Activity of Grubbs Catalysts

Ross N. Chapman and Paramjit S. Arora\*

*Department of Chemistry, New York University, New York, New York, 10003*

## Supporting Information

### Table of Contents

| page |                                                                                               |
|------|-----------------------------------------------------------------------------------------------|
| S2   | General                                                                                       |
| S3   | Synthesis and characterization of <i>N</i> -allyl dipeptides                                  |
| S6   | Synthesis of resin bound bis-olefins                                                          |
| S6   | Descriptions of RCM procedures                                                                |
| S7   | Analytical-HPLC traces of metathesized peptides <b>8</b> , <b>9</b> , <b>10</b> and <b>11</b> |
| S11  | <b>Table S1.</b> Summary of all microwave-assisted RCM reactions performed                    |
| S12  | Description of microwave conditions and variables                                             |
| S14  | <b>Figure S5.</b> Representative HPLC traces of crude RCM reaction mixtures                   |
| S16  | <b>Table S2.</b> Effect of bis-olefin sequence on the metathesis yields                       |

**General.** Commercial-grade reagents and solvents were used without further purification except as indicated.  $\text{CH}_2\text{Cl}_2$  and DMF were dried prior to use by percolation through anhydrous  $\text{Al}_2\text{O}_3$  as described by Grubbs and coworkers.<sup>1</sup> All reactions were stirred magnetically; moisture-sensitive reactions were performed under nitrogen in flame-dried glassware. Thin-layer chromatography (TLC), usually using either ethyl acetate/hexane or methanol/ $\text{CH}_2\text{Cl}_2$  as the solvent system, was used to monitor reactions. Visualization was accomplished by either ultraviolet light or by immersing the plate in a 1% aqueous solution of potassium permanganate and heating. Flash chromatography with silica gel was performed following the conditions described by Still and coworkers.<sup>2</sup> Solvents were removed by rotary evaporation under reduced pressure; where appropriate, the residue was further dried using a vacuum pump. Reverse-phase HPLC experiments were conducted with 4.6 x 150 mm (analytical scale) or 21.4 x 150 mm (preparative scale) Waters C18 reverse phase columns using a Beckman Coulter HPLC equipped with a System Gold 168 Diode array detector. The typical flow rates for analytical and preparative HPLC were 1 mL/min and 8 mL/min, respectively. In all cases, 0.1% aqueous TFA and acetonitrile buffers were used. Proton NMR spectra were obtained on a Bruker AV-400 (400 MHz), Bruker AV-500 (500 MHz), or Varian-200 (200 MHz) spectrometer. Carbon NMR spectra were obtained on a Bruker (100.5 MHz) spectrometer. Proton chemical shifts are reported as  $\delta$  values relative to tetramethylsilane (0.00 ppm) or to the particular solvent used in the experiment ( $\text{CDCl}_3$ : 7.26 ppm or  $\text{D}_2\text{O}$ : 4.80 ppm). Carbon chemical shifts are reported as  $\delta$  values relative to the particular solvent used in the experiment ( $\text{CDCl}_3$ : 77.0 ppm). Data is reported as follows: chemical shift, multiplicity (s = singlet, d = doublet, t = triplet, q = quartet, m = multiplet, dd = doublet of doublet, br = broad), coupling constant, and integration.

<sup>1</sup> Pangborn, A. B.; Giardello, M. A.; Grubbs, R. A.; Rosen, R. K.; Timmers, F. J. *Organometallics* **1996**, *15*, 1518-1520.

<sup>2</sup> Still, W.; Kahn, M.; Mitra, A. *J. Org. Chem.* **1978**, *43*, 2923-2925.

(IR) spectra were obtained with a Thermo Nicolet Avatar 360 FTIR. High-resolution mass spectra (HRMS) were obtained by fast atom bombardment (FAB) of samples in *m*-nitrobenzyl alcohol with Cs<sup>+</sup> ions. FAB experiments were performed by MSU-NIH Mass Spectrometry Facility, East Lansing, MI. LCMS data was obtained on an Agilent 1100 series LC/MSD (XCT) electrospray trap.

### Synthesis of *N*-allyl dipeptides

The Synthesis of Fmoc-Ala-*N*-allyl-Ala-OH was synthesized as previously reported.<sup>3</sup>

#### Scheme S1

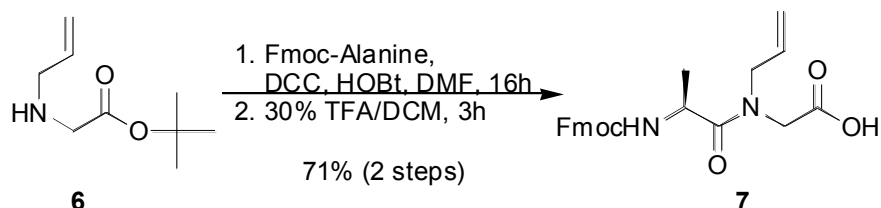

**Fmoc-Ala-(*N*-allyl)-Gly-OH (7).** A solution of *N,N*-dicyclohexylcarbodiimide (DCC, 0.66 g, 3.21mmol), 1-hydroxybenzotriazole (HOBt, 0.43 g, 3.21 mmol) and Fmoc-Ala-OH (0.99 g, 3.21 mmol) was stirred in DMF (10 mL) for 10 minutes. *N*-allyl-Gly-*t*-butyl ester **6** (0.50 g, 2.92 mmol) was then added to the flask and the resulting mixture was stirred at room temperature overnight. The reaction mixture was then poured into 30 mL water and extracted with ether (3 x 25 mL). The combined organic layers were combined and dried with anhydrous magnesium sulfate, filtered and concentrated by rotary evaporation. The resulting yellow oil was then

3. Chapman, R. N.; DiMartino, G.; Arora, P. S.; *J. Am. Chem. Soc.* **2004**, *126*, 12252-12253.

purified by flash chromatography (gradient of 10-30% ethyl acetate in hexanes) to afford the dipeptide Fmoc-Ala-*N*-allyl-Gly-*O**t*Bu as a colorless oil (1.06 g, 2.28 mmol, 78%)

$^1\text{H}$  NMR (400 MHz,  $\text{CDCl}_3$ , 248 K, mixture of rotamers 1:3)  $\delta$  7.75 (d,  $J = 7.5$  Hz, 2H), 7.52-7.58 (m, 2H), 7.39 (t,  $J = 7.4$  Hz, 2H), 7.27-7.32 (m, 2H), 6.14 (d,  $J = 7.8$  Hz, 0.25H), 6.06 (d,  $J = 7.7$  Hz, 0.75 Hz), 5.70-5.80 (m, 0.75H), 5.61-5.69 (m, 0.25H), 5.10-5.25 (m, 2H), 4.62 (quintet,  $J = 7.1$  Hz, 0.75H), 4.43-4.49 (m, 0.25H), 4.14-4.30 (m, 4H), 3.80-4.07 (m, 2H), 3.68 (d,  $J = 17.3$  Hz, 1H), 1.40 (s, 9H), 1.37 (d,  $J = 6.7$  Hz, 2.75H), 1.31 (d,  $J = 6.7$  Hz, 0.25H);  $^{13}\text{C}$  NMR (100 MHz)  $\delta$  167.76, 155.62, 143.93, 143.81, 141.29, 132.01, 127.07, 125.19, 119.96, 118.52, 82.09, 67.08, 51.18, 48.07, 47.13, 33.14, 28.04, 19.32; IR (film) 3303, 1741, 1656  $\text{cm}^{-1}$ ; HRMS  $m/z$  for  $\text{C}_{27}\text{H}_{32}\text{N}_2\text{O}_5$   $[\text{M} + \text{H}]^+$  calcd 465.2390, found 465.2387

A solution of Fmoc-Ala-*N*-allyl-Gly-*O**t*Bu (1.06 g, 2.28 mmol) in 35 mL dichloromethane, 15 mL trifluoroacetic acid was stirred for 2 h. The solution was then poured into 75 mL water and extracted with DCM (3 x 50 mL). The organic layers were combined and dried with anhydrous magnesium sulfate, filtered and concentrated to afford 0.84 g of **7** as a white powder (91%).

$^1\text{H}$  NMR (400 MHz,  $\text{CDCl}_3$ , mixture of rotamers 1:3)  $\delta$  7.67 (d,  $J = 7.5$  Hz, 2H), 7.48-7.53 (m, 2H), 7.31 (t,  $J = 7.4$  Hz, 2H), 7.13 (m, 2H), 5.99 (d,  $J = 8.2$  Hz, 0.25H), 5.90 (d,  $J = 8.1$  Hz, 0.75H), 5.51-5.69 (m, 1H), 4.97-5.11 (m, 2H), 4.66 (quintet,  $J = 7.1$  Hz, 0.75H) 4.40-4.48 (m, 0.25H), 4.25 (t,  $J = 6.8$  Hz, 1.50H), 4.19 (d,  $J = 17.4$  Hz, 1H), 4.11 (t,  $J = 17.4$  Hz, 1H), 3.84 (d,  $J = 17.4$  Hz, 1H), 1.31 (d,  $J = 6.8$  Hz, 2.25H), 1.27 (d,  $J = 6.7$  Hz, 0.75H);  $^{13}\text{C}$  NMR (100 MHz)  $\delta$  173.92, 172.39, 156.07, 143.92, 141.29, 131.95, 127.74, 127.07, 125.2, 119.96, 118.88, 77.27, 67.36, 51.29, 47.13, 19.08; IR (film) 3305, 1717, 1653  $\text{cm}^{-1}$ ; HRMS  $m/z$  for  $\text{C}_{27}\text{H}_{32}\text{N}_2\text{O}_5$   $[\text{M} + \text{H}]^+$  calcd 409.1734, found 409.1763

**NMR spectra of *N*-allyl dipeptide **7** (mixture of rotamers).**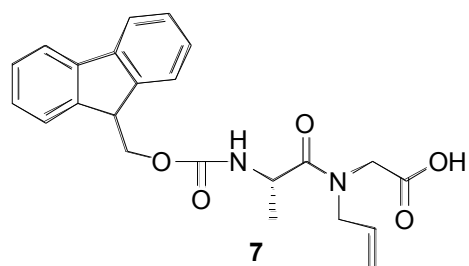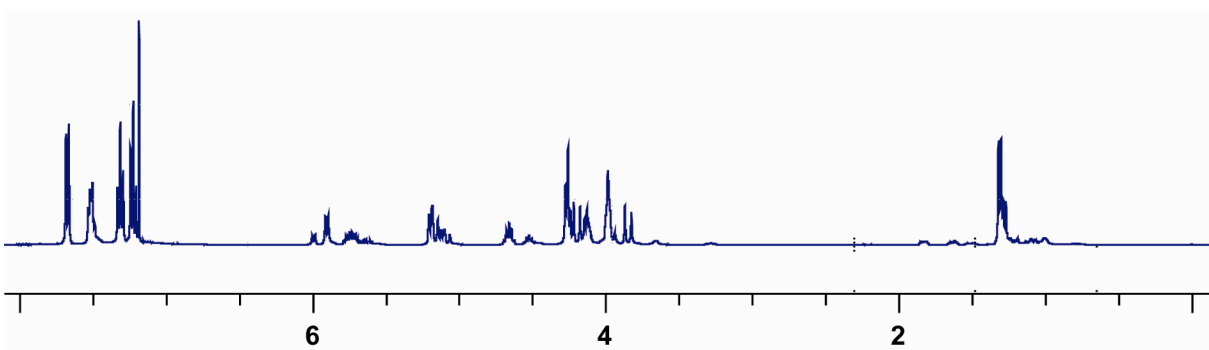 $^1\text{H}$  NMR for **7** in  $\text{CDCl}_3$ 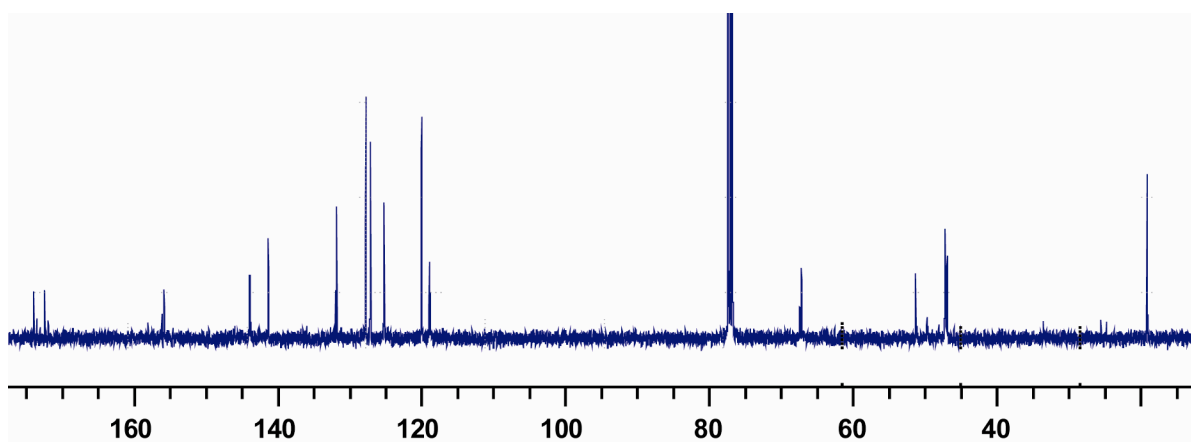 $^{13}\text{C}$  NMR for **7** in  $\text{CDCl}_3$

**Synthesis of resin bound bis-olefin peptides.** Resin bound bis-olefin peptides were synthesized by conventional Fmoc solid-phase chemistry on Rink amide resin or pre-loaded Wang resin with appropriate substitutions of N-allylated dipeptide and 4-pentenoic acid. In each coupling step, the appropriate Fmoc amino acid (5 equiv) was activated with HBTU (4.9 equiv) in 10% DIPEA/NMP solution for 10 min and added to the resin bound free amine. The resulting mixture was shaken for 30–45 min. The coupling efficiency was monitored by ninhydrin test. After each coupling step, the Fmoc group was removed by treatment with 20% piperidine in NMP (2 x 20 min). The bis-olefin containing resin was thoroughly washed with DMF and dichloromethane respectively, and dried under vacuum overnight. Peptides were stored at 4°C until needed.

**General method for RCM in the microwave.** The resin bound bis-olefin (20 mg) was placed in a thick wall glass tube (CEM) and sealed with a cap. An appropriate amount of catalyst in 200µl of freshly distilled solvent was added, the tube was purged with argon and the resin allowed to swell for 20 min. All reactions were carried out in the CEM discover microwave reactor with a run time of no more than 3 minutes, while the hold time and temperature varied as indicated in Table S1. All microwave reactions were conducted in a sealed glass tube; the pressure was monitored and did not exceed 40 psi, while the temperature was monitored by an IR sensor at the base of the reaction vessel. After the indicated time had elapsed, the solution was cooled rapidly by compressed air, and the resin washed with DCM (3x), 10% 1,3-bis(diphenylphosphino)propane in DCM (6x) and DCM (3x), then dried for 3 h under vacuum. The peptide was cleaved from the resin with 95% TFA: 2.5% triisopropylsilane : 2.5% water for

90 min, filtered, placed on a rotary evaporator for 5 minutes at 40 °C, then dissolved in 0.2 mL 0.1% TFA in water. The resulting solution was then monitored by LC-MS and analytical HPLC.

**RCM under conventional heating conditions.** Reactions with HGII were carried out at 60 °C in DCE with 15 mol% catalyst for 24-72 h, and those with GII at 35 °C in DCE with 15 mol% catalyst for 48 h, as previously reported.<sup>4</sup> The reaction was carried out in a temperature-controlled oil-bath.

**Figure S1. HBS Peptide 8 (from bis-olefin 1): HPLC trace (216 nm)**

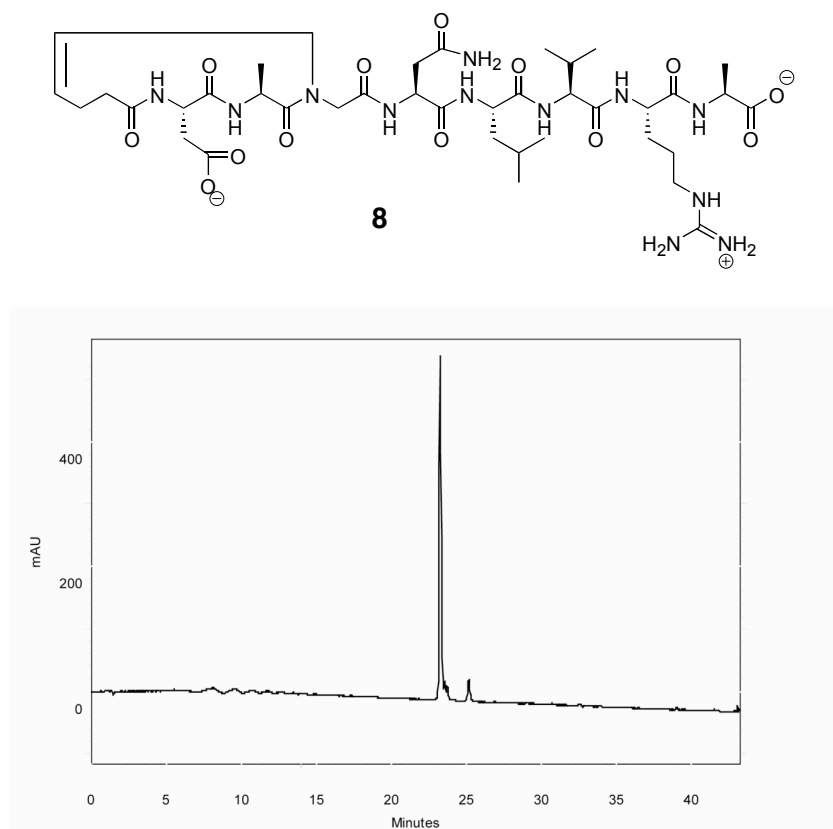

ESIMS  $m/z$   $C_{39}H_{63}N_{12}O_{13}$   $[M + H]^+$  calcd 909.0, found 909.7

4. Dimartino, G.; Wang, D.; Chapman, R. N.; Arora, P. S.; *Org. Lett.* **2005**, 7, 2389-2392.

**Figure S2. HBS Peptide 9 (from bis-olefin 2): HPLC trace (216 nm)**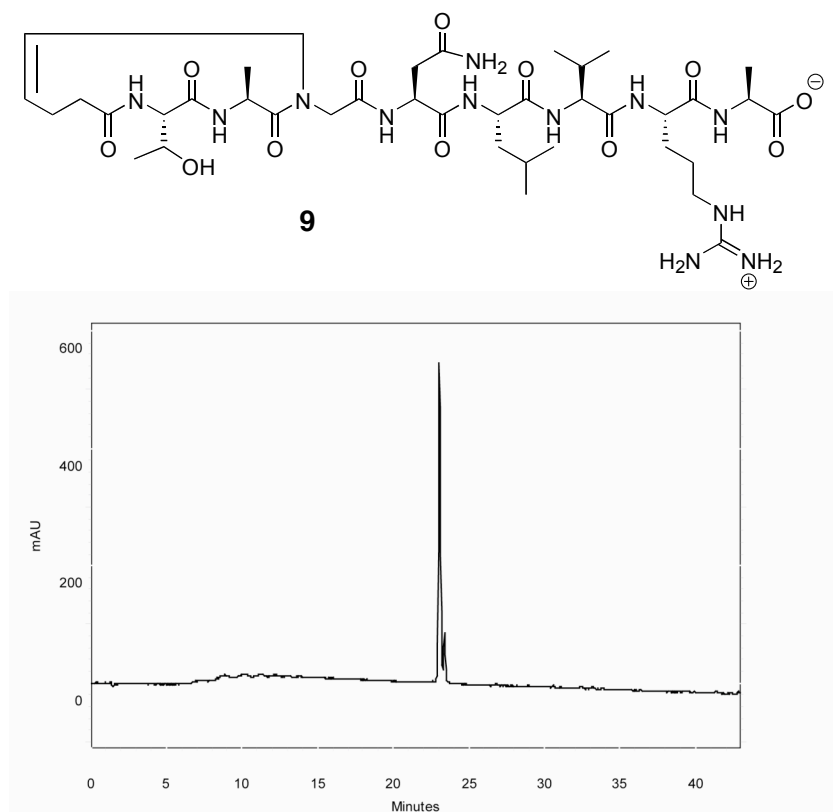

ESIMS  $m/z$   $C_{39}H_{65}N_{12}O_{12}$   $[M + H]^+$  calcd 895.0, found 895.5



**Figure S3. HBS Peptide 10 (from bis-olefin 3): HPLC trace (216 nm)**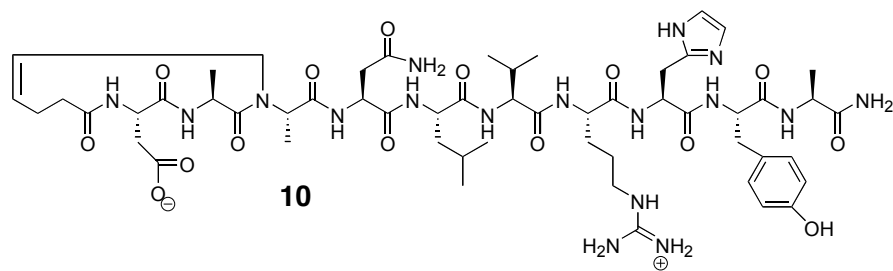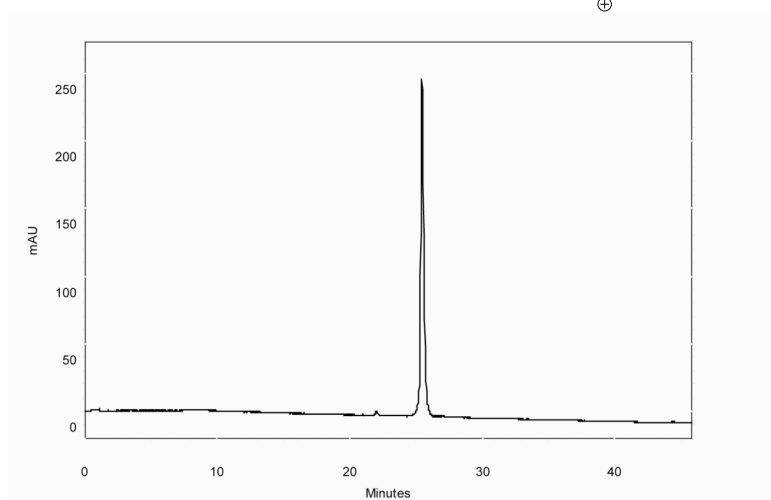

ESIMS  $m/z$   $C_{55}H_{81}N_{16}O_{16} [M + H]^+$  calcd 1222.6, found 1222.6

**Figure S4. HBS Peptide 11 (from bis-olefin 4) : HPLC trace (216 nm)**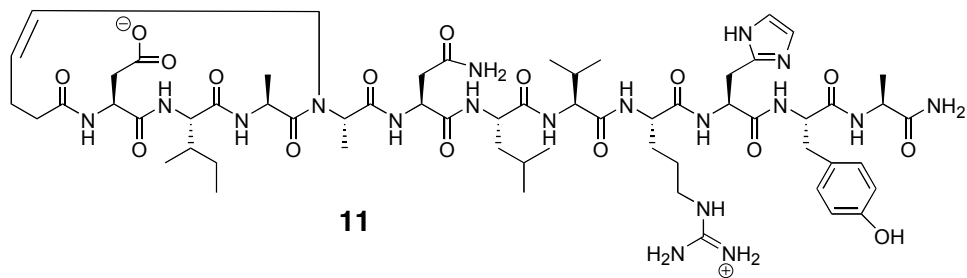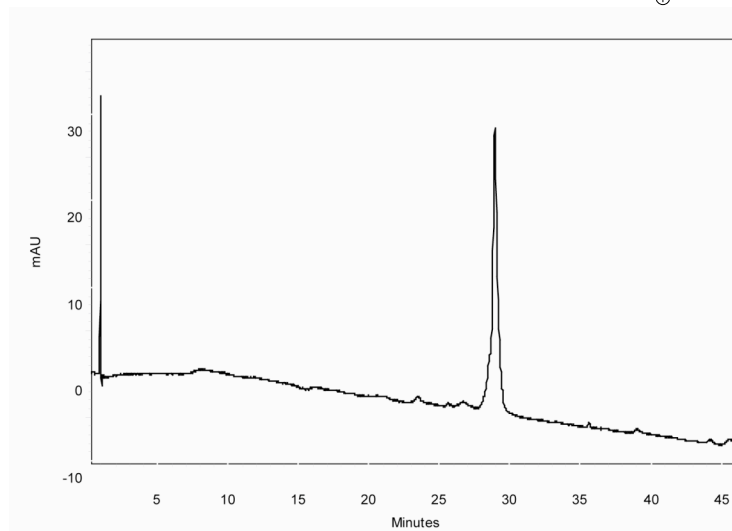

ESIMS  $m/z$   $C_{61}H_{92}N_{17}O_{17}$   $[M + H]^+$  calcd 1335.7, found 1335.7

**Table S1.** Summary of microwave-assisted RCM reactions performed on **1-5**

| Peptide | Catalyst        | Temp (°C)         | Time (minutes) | Solvent       | RCM (%) | CM (%) |
|---------|-----------------|-------------------|----------------|---------------|---------|--------|
| 1       | HGII            | 120               | 1              | DCE           | Trace   | 0      |
| 1       | HGII            | 120               | 5              | DCE           | 18      | 0      |
| 1       | HGII            | 120               | 10             | DCE           | 24      | 0      |
| 1       | HGII            | 200               | 0.5            | Bmim          | 0       | 0      |
| 1       | HGII (30 mol %) | 200               | 0.5            | Bmim          | 0       | 0      |
| 1       | HGII            | 120               | 5              | DCE           | 24      | 0      |
| 1       | GII             | 100               | 2              | DCE           | 70      | 0      |
| 1       | HGII            | 160               | 10             | Toluene       | 0       | 89     |
| 1       | GII             | 160               | 10             | Toluene       | 56      | 0      |
| 1       | HGII            | 200               | 5              | DCB           | 81      | 0      |
| 1       | GII             | 120               | 2              | DCB           | 80      | 0      |
| 2       | HGII            | 100               | 2              | DCE           | 34      | 0      |
| 2       | HGII            | 100               | 5              | DCE           | 46      | 0      |
| 2       | HGII            | 120               | 5              | DCE           | 52      | 0      |
| 2       | HGII            | 150               | 5              | DCE           | 66      | 0      |
| 2       | HGII            | 120 <sup>^</sup>  | 5              | DCE           | 23      | 0      |
| 2       | HGII            | 120 <sup>^^</sup> | 5              | DCE           | 46      | 0      |
| 2       | HGII (7 mol %)  | 120               | 5              | DCE           | 26      | 0      |
| 2       | HGII (7 mol %)  | 120               | 10             | DCE           | 26      | 0      |
| 2       | HGII (7 mol %)  | 120               | 20             | DCE           | 23      | 0      |
| 2       | HGII (7 mol %)  | 120               | 30             | DCE           | 25      | 0      |
| 2       | HGII            | 60                | 5              | DCE           | Trace   | 0      |
| 2       | HGII            | 100               | 5              | DCE           | 9       | 0      |
| 2       | HGII            | 120               | 5              | DCE           | 22      | 0      |
| 2       | HGII            | 140               | 5              | DCE           | 46      | 0      |
| 2       | HGII            | 160               | 5              | DCE           | 69      | 0      |
| 2       | GI              | 120               | 5              | DCE           | 17      | 0      |
| 2       | CR              | 120               | 5              | DCE           | 0       | 0      |
| 2       | GII             | 120               | 1              | DCE           | 47      | 0      |
| 2       | GII             | 60                | 2              | DCE           | 21      | 0      |
| 2       | GII             | 100               | 2              | DCE           | 55      | 0      |
| 2       | GII             | 120               | 2              | DCE           | 71      | 0      |
| 2       | GII             | 140               | 2              | DCE           | 61      | 0      |
| 2       | GII             | 160               | 5              | Toluene       | 44      | 0      |
| 2       | HGII            | 160               | 10             | Toluene       | 0       | 92     |
| 2       | GII (1 mol %)   | 100               | 2              | DCE           | 15      | 0      |
| 2       | GII (5 mol %)   | 100               | 2              | DCE           | 29      | 0      |
| 2       | GII (10 mol %)  | 100               | 2              | DCE           | 41      | 0      |
| 2       | GII (20 mol %)  | 100               | 2              | DCE           | 63      | 0      |
| 2       | HGII (1 mol %)  | 160               | 5              | DCE           | Trace   | 0      |
| 2       | HGII (7 mol %)  | 160               | 5              | DCE           | 36      | 0      |
| 2       | HGII (25 mol %) | 160               | 5              | DCE           | 56      | 0      |
| 2       | HGII            | 200               | 5              | 10 % Bmim/DCE | Trace   | 0      |
| 2       | HGII            | 200               | 5              | 10 % DMF/DCE  | Trace   | 0      |
| 2       | HGII            | 160               | 10             | Toluene       | 4       | 75     |
| 2       | GII             | 160               | 10             | Toluene       | 19      | 0      |
| 2       | GII             | 120               | 2              | DCB           | 84      | 0      |
| 2       | HGII            | 200               | 5              | DCB           | 83      | 0      |
| 3       | HGII            | 160               | 10             | Toluene       | 12      | 43     |
| 3       | GII             | 160               | 5              | Toluene       | 34      | 0      |
| 3       | GII             | 120               | 2              | DCE           | 48      | 0      |
| 3       | GII             | 160               | 2              | DCE           | 41      | 0      |
| 3       | HGII            | 200               | 10             | DCB           | 67      | 0      |
| 3       | GII             | 200               | 10             | DCB           | 11      | 0      |
| 3       | HGII            | 160               | 5              | DCE           | 42      | 0      |
| 3       | HGII            | 120               | 2              | DCE           | 11      | 0      |
| 3       | HGII            | 60                | 5              | DCB           | 4       | 0      |
| 3       | HGII            | 80                | 5              | DCB           | 9       | 0      |
| 3       | HGII            | 100               | 5              | DCB           | 11      | 0      |
| 3       | HGII            | 120               | 5              | DCB           | 20      | 0      |
| 3       | HGII            | 140               | 5              | DCB           | 34      | 0      |
| 3       | HGII            | 160               | 5              | DCB           | 58      | 0      |
| 3       | HGII            | 180               | 5              | DCB           | 63      | 0      |
| 3       | HGII            | 200               | 5              | DCB           | 69      | 0      |
| 3       | HGII            | 220               | 5              | DCB           | 62      | 0      |

|   |                  |     |    |         |       |    |
|---|------------------|-----|----|---------|-------|----|
| 3 | GII              | 60  | 2  | DCB     | 10    | 0  |
| 3 | GII              | 80  | 2  | DCB     | 22    | 0  |
| 3 | GII              | 100 | 2  | DCB     | 38    | 0  |
| 3 | GII              | 120 | 2  | DCB     | 76    | 0  |
| 3 | GII              | 140 | 2  | DCB     | 61    | 0  |
| 3 | GII              | 160 | 2  | DCB     | 62    | 0  |
| 3 | GII              | 180 | 2  | DCB     | 46    | 0  |
| 3 | GII              | 200 | 2  | DCB     | 41    | 0  |
| 3 | GII              | 220 | 2  | DCB     | 36    | 0  |
| 4 | HGII             | 200 | 5  | DCB     | 76    | 0  |
| 4 | GII              | 120 | 2  | DCB     | 58    | 0  |
| 5 | HGII             | 200 | 5  | DCB     | Trace | 0  |
| 5 | GII              | 120 | 2  | DCB     | 0     | 0  |
| 5 | HGII             | 160 | 10 | Toluene | 0     | 71 |
| 5 | GII              | 160 | 10 | Toluene | 0     | 0  |
| 5 | HGII (100 mol %) | 200 | 5  | DCB     | Trace | 0  |

All reactions contained 15 mol % unless otherwise stated. All yields are reported as % conversion of bis-olefin to either the RCM or CM product as determined by the rpHPLC peak areas at 216 nm. Abbreviations: GII = Grubbs II, HGII = Hoveyda-GrubbsII, GI = Grubbs I, CR = ciba-ruthenium, RCM = Ring Closing Metathesis, CM = Cross Metathesis, SM = Starting material (bis-olefin), DCE = Dichloroethane, DCB = dichlorobenzene, bmim = 1-butyl-3-methylimidazolium tetra fluoroborate, DMF = Dimethylformide, ^ = 100 W microwave power, ^^ = 200 W microwave power.

### Description of microwave conditions and variables

All microwave reactions were performed at the desired temperatures as stated. Typical microwave power, pressure and rate of temperature acceleration are as follows:

#### **Hoveyda - Grubbs II:**

RT - 200°C in 110 seconds (Ramp = 120 seconds)

Pressure reaches 30 psi (maximum)

Hold time varies according to data in table

Microwave Power reaches 275W after 110 seconds then decreases to 180W for remainder of reaction

200°C - 50°C in 60 seconds

#### **Grubbs II:**

RT - 120°C in 45 seconds (Ramp = 60 seconds)

Pressure reaches 10 psi (maximum)

Hold time varies according to data in table

Microwave Power reaches 75W after 30 seconds then decreases to 25W for the remainder of the reaction

120°C - 50°C in 30 seconds

**Power control:**

For the reactions where power is stated, the amount of power to reach the desired temperature was achieved by allowing different pressures of compressed air to hit the sealed microwave vessel. This works by keeping the internal temperature down, so an increase in microwaves is seen by the reaction in progress. At 300W, more compressed air is cooling the reaction than at 200W. *However, to our knowledge it has not been clearly proven that this procedure does not alter the temperature of the reaction at the side of the vessel compared to the internal solution, or indeed, if the whole temperature of the reaction is altered significantly. As a result, we run the reactions as a function of the target temperatures, as monitored by the IR probe, rather than by controlling power.*

**Figure S5.** Selected HPLC traces (216 nm) of CRUDE reaction mixtures. Bis-olefin **3** was treated with either Hoveyda-Grubbs II or Grubbs II catalyst for the indicated duration and temperature to yield cyclic peptide **10**.

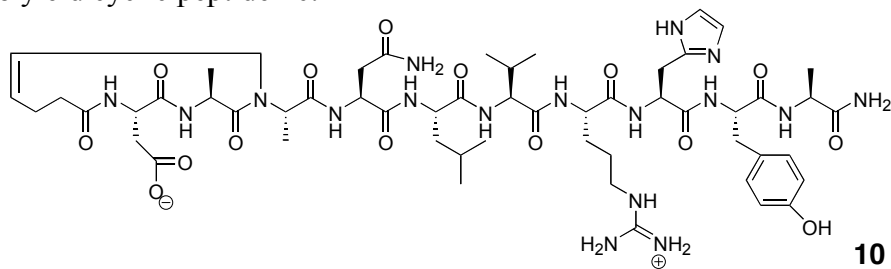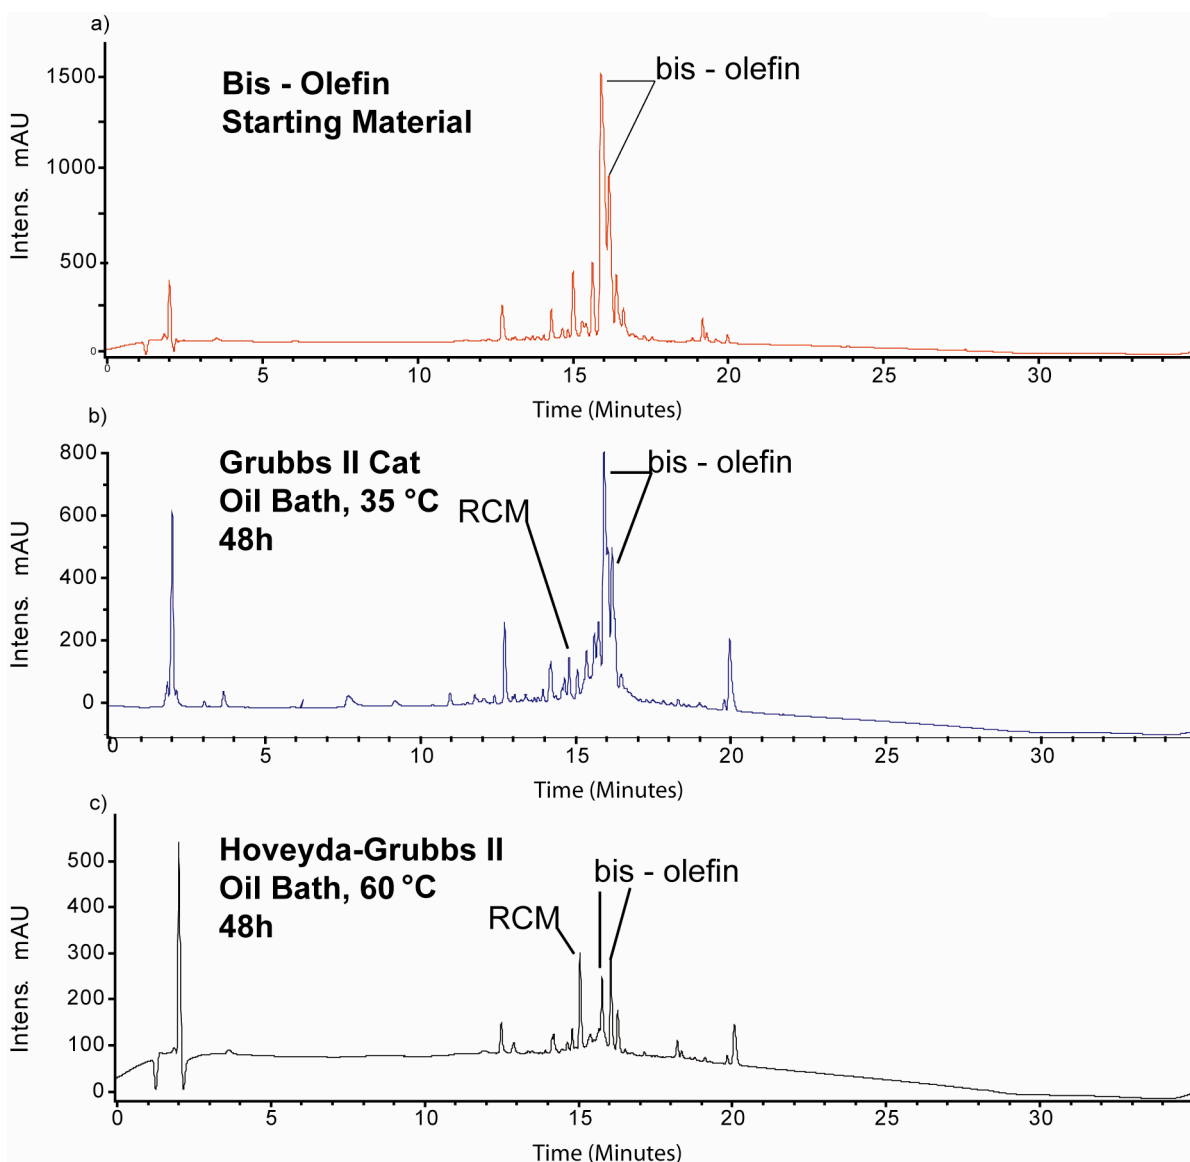

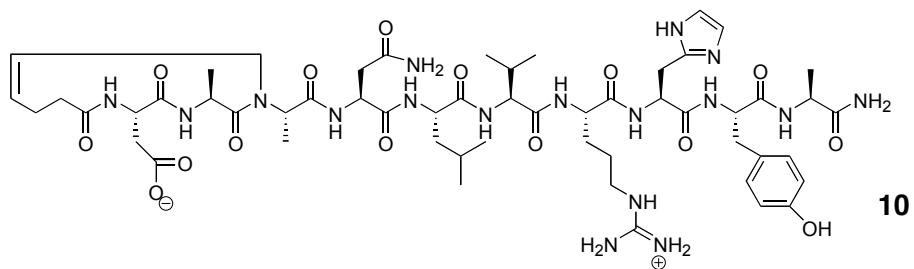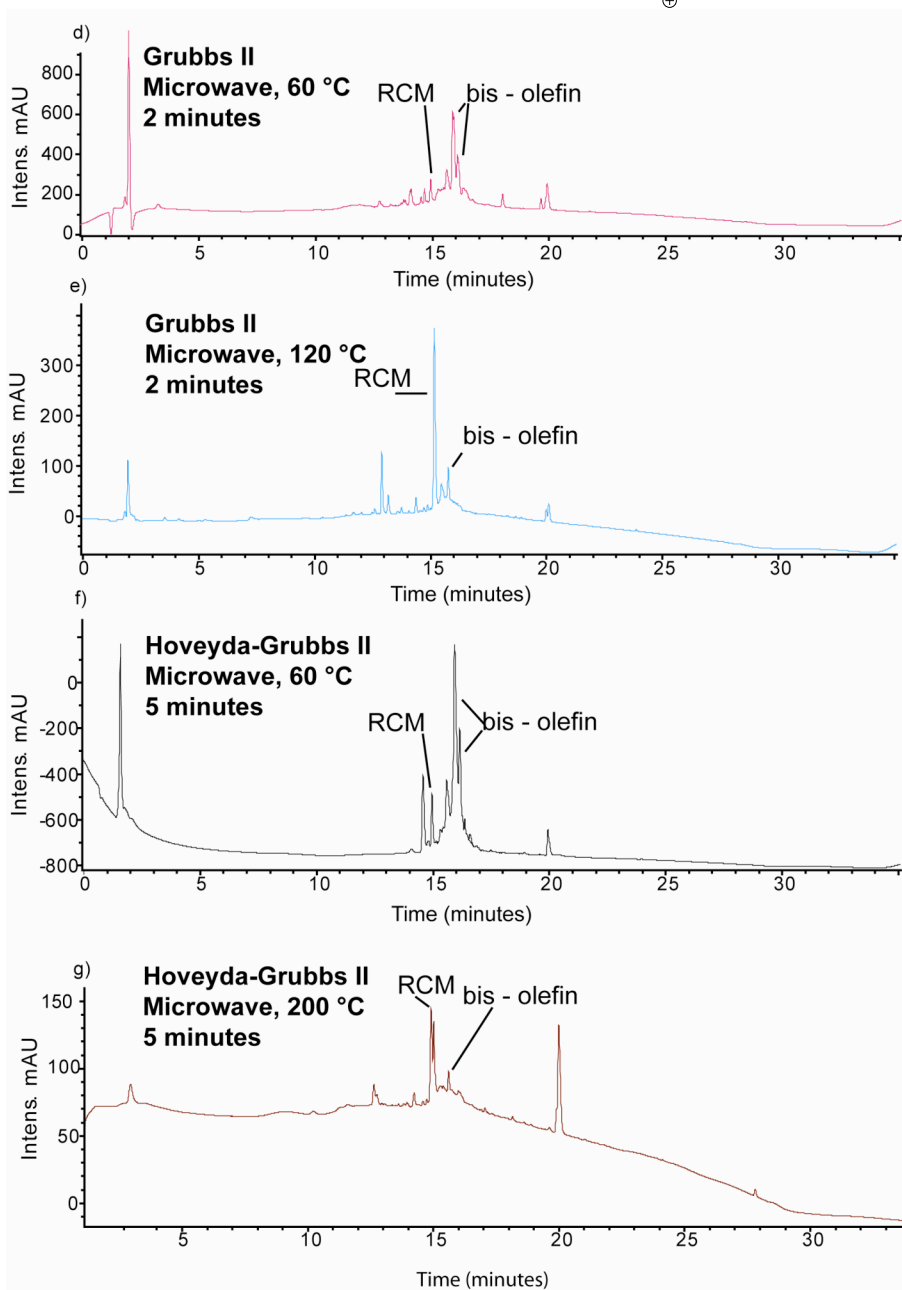

### Effect of bis-olefin sequence on the RCM reaction under microwave conditions

The sequences listed in Table S2 are different than those shown in the main manuscript, and are included to assess the effect of sequence (beta-branched amino acids, etc) on the ring-closing metathesis reaction under the microwave conditions. We find that the microwave procedure affords high yields of the respective macrocycles from a diverse set of bis-olefins. Bis-olefins **14** and **15** represent the *same macrocycle sequences as previously described<sup>4</sup> for the optimization of the oil-bath conditions*. Our best yields for RCM **14** and **15** with oil-bath method were in the 65-80% range and are a bit higher under the microwave conditions.<sup>4, 5</sup> The data shows that microwave conditions perform as well or better than the oil-bath conditions regardless of the sequence.

**Table S2.** Effect of bis-olefin sequence on the metathesis yields under the *optimized* microwave or oil-bath conditions.

| bis-olefin | sequence                   | % conversion with HGII in microwave | % conversion with GII in microwave | % conversion with HGII in oil-bath |
|------------|----------------------------|-------------------------------------|------------------------------------|------------------------------------|
| <b>12</b>  | XEVA*QRLAIIAY              | 84%                                 | NP                                 | NP                                 |
| <b>13</b>  | XQQL*EEDLKAYLDWITQ         | 81%                                 | NP                                 | NP                                 |
| <b>14</b>  | XQVG*RQLAAIYR <sup>§</sup> | 92%                                 | 95%                                | 74% <sup>§</sup>                   |
| <b>15</b>  | XRIA*RLEEKYK <sup>§</sup>  | 80% <sup>†</sup>                    | NP                                 | 65% <sup>§</sup>                   |
| <b>16</b>  | XTAA*DCEYNAR               | 85%                                 | NP                                 | NP                                 |
| <b>17</b>  | XDAA*NYRHK                 | 88%                                 | NP                                 | NP                                 |

X= pentenoic acid; \* denotes the *N*-allyl amino acid; NP: not performed; <sup>†</sup> complete consumption of the bis-olefin but a small amount of the cross-metathesis product observed. <sup>§</sup> data from references 4 and 5.

5. Wang, D.; Chen, K.; Kulp, J. K. III, Arora, P. S. *J. Am. Chem. Soc.* **2006**, *128*, 9248-9256.
